# Supplementary material for: A genetic modifier of symptom onset in Pompe disease
Source: PubMed Central journal article supplement — eBioMedicine. 2019 Mar 25;43:553–61. doi: 10.1016/j.ebiom.2019.03.048 (PMC6562017; doi:10.1016/j.ebiom.2019.03.048), 2019-03-25
Supplement: mmc1.pdf [file mmc1.pdf]

## **SUPPLEMENTARY DATA**

## SUPPLEMENTARY TEXT

Pompe disease is an autosomal recessive disorder: two disease-associated variants from two different alleles are required to cause the disease. In the most severe classic infantile form of the disease, both disease-associated variants will result in a complete lack of residual GAA enzyme activity. However, GAA protein may still be expressed, but it will be enzymatically inactive for example due to misfolding. In the late onset form of the disease, usually one variant has no residual GAA enzyme activity at all, and one variant has some residual GAA enzyme activity. It is rare that late onset Pompe patients have two alleles that both express some residual GAA enzyme activity. Therefore, in the far majority of late onset Pompe patients, the contribution of one allele to the total GAA enzyme activity will be zero, and the entire residual GAA enzyme activity is contributed by one allele only. In the majority (90%) of late onset patients of Caucasian origin, this allele has the IVS1 disease-associated variant. The cases above describe compound heterozygous patients: patients with two different disease-associated variants.

In the case of homozygous patients, the situation is slightly different. When both alleles contain the same disease-associated variant with no residual GAA enzyme activity, the patient will have classic infantile Pompe disease. When both alleles contain the same disease-associated variant with some residual GAA enzyme activity, it will become important how high the total residual enzyme activity derived from both alleles is. If this is above the disease threshold of 20-30% of healthy control values, the individual will not have Pompe disease i.e. will remain asymptomatic. When this is below the disease threshold, the individual will develop symptoms of late onset Pompe disease. In the case of the IVS1 variant: this variant has 10-15% residual enzyme activity. When the IVS1 variant is combined with a second variant that has no residual enzyme activity in compound heterozygous IVS1 patients, the combined GAA enzyme activity will be 10-15%, which is below the disease threshold and the patient will develop symptoms of late onset Pompe disease. When the IVS1 variant is present at homozygous state, the combined GAA enzyme activity will be 20-30%, which is at or above the disease threshold. In practice, it has become clear that the majority of homozygous IVS1 individuals remain asymptomatic. Only a few homozygous IVS1 patients are known that have developed symptoms of late onset Pompe disease.

Pompe disease has over 400 disease-associated variants, that we maintain in the open access Pompe mutation database at [www.pompecenter.nl](http://www.pompecenter.nl) (go to molecular aspects, mutations). We have identified a modifier that is present in a subset of patients that carry the common IVS1 variant. We suspect that also other putative modifying factors may exist that influence age at symptom onset. This is further discussed in the discussion section of the main manuscript..

## SUPPLEMENTARY FIGURES

**A**

Age at diagnosis in compound heterozygous IVS1 patients (n = 143)

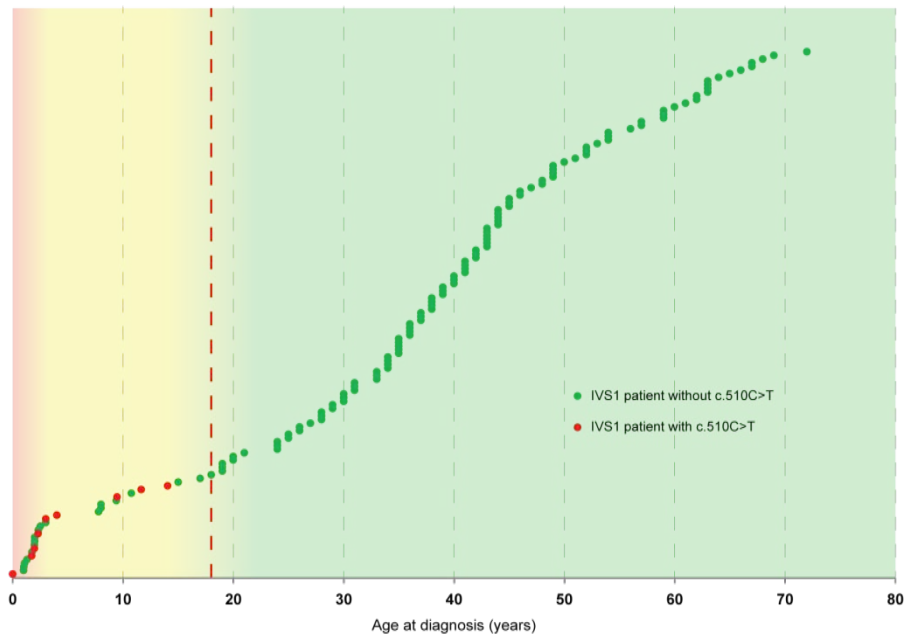

**B**

| <i>c.510C&gt;T</i> on IVS1 allele | All patients (n) | Patients diagnosed at adulthood (n) | Patients diagnosed at childhood (n) | Median age at diagnosis (years) |
|-----------------------------------|------------------|-------------------------------------|-------------------------------------|---------------------------------|
| +                                 | 9                | 0                                   | 9                                   | 5,4                             |
| -                                 | 134              | 116                                 | 18                                  | 37                              |

**C**

Age at symptom onset in IVS1/c.525del patients (n = 57)

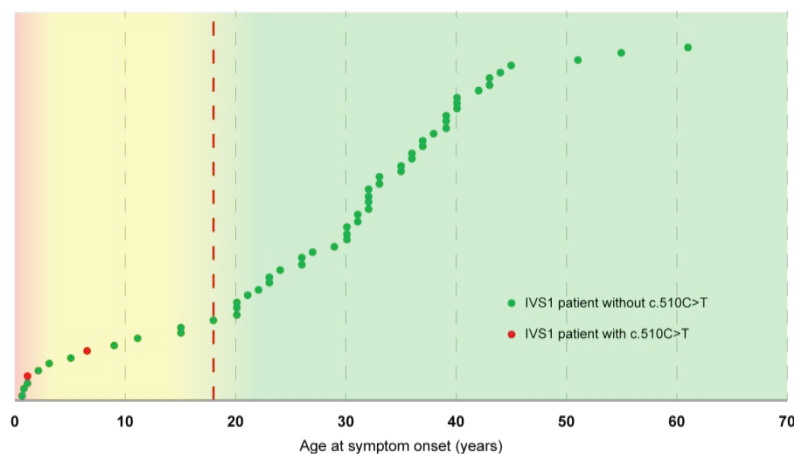

**Supplementary Figure S1: Association of c.510C>T with age symptom onset and age at diagnosis in compound heterozygous IVS1 patients.** (A) Distribution of ages at diagnosis in all compound heterozygous IVS1 patients with c.510C>T (red symbols) and without c.510C>T (green symbols). Each dot in the graph represents one patient. The dashed red line indicates the cut-off of 18 between patients with childhood onset and adult onset of symptoms. (B) Median age at diagnosis in all compound heterozygous IVS1 patients with and without c.510C>T. \*\*\*  $p < 0.001$ . (C) Distribution of ages at symptom onset in patients with the same IVS1/c.525del genotype. All patients in this graph have the IVS1 variant on one allele and the c.525del pathogenic variant on the other allele.

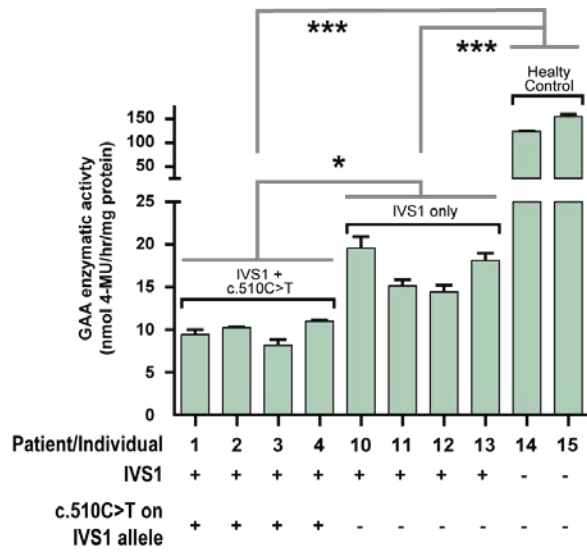

**Supplementary Figure S2: Analysis GAA enzymatic activity in compound heterozygous patients.** GAA enzymatic activity in fibroblasts from compound heterozygous IVS1 patients that were analyzed in Figure 3C-F. \*  $p < 0.05$ , \*\*\*  $p < 0.001$ .

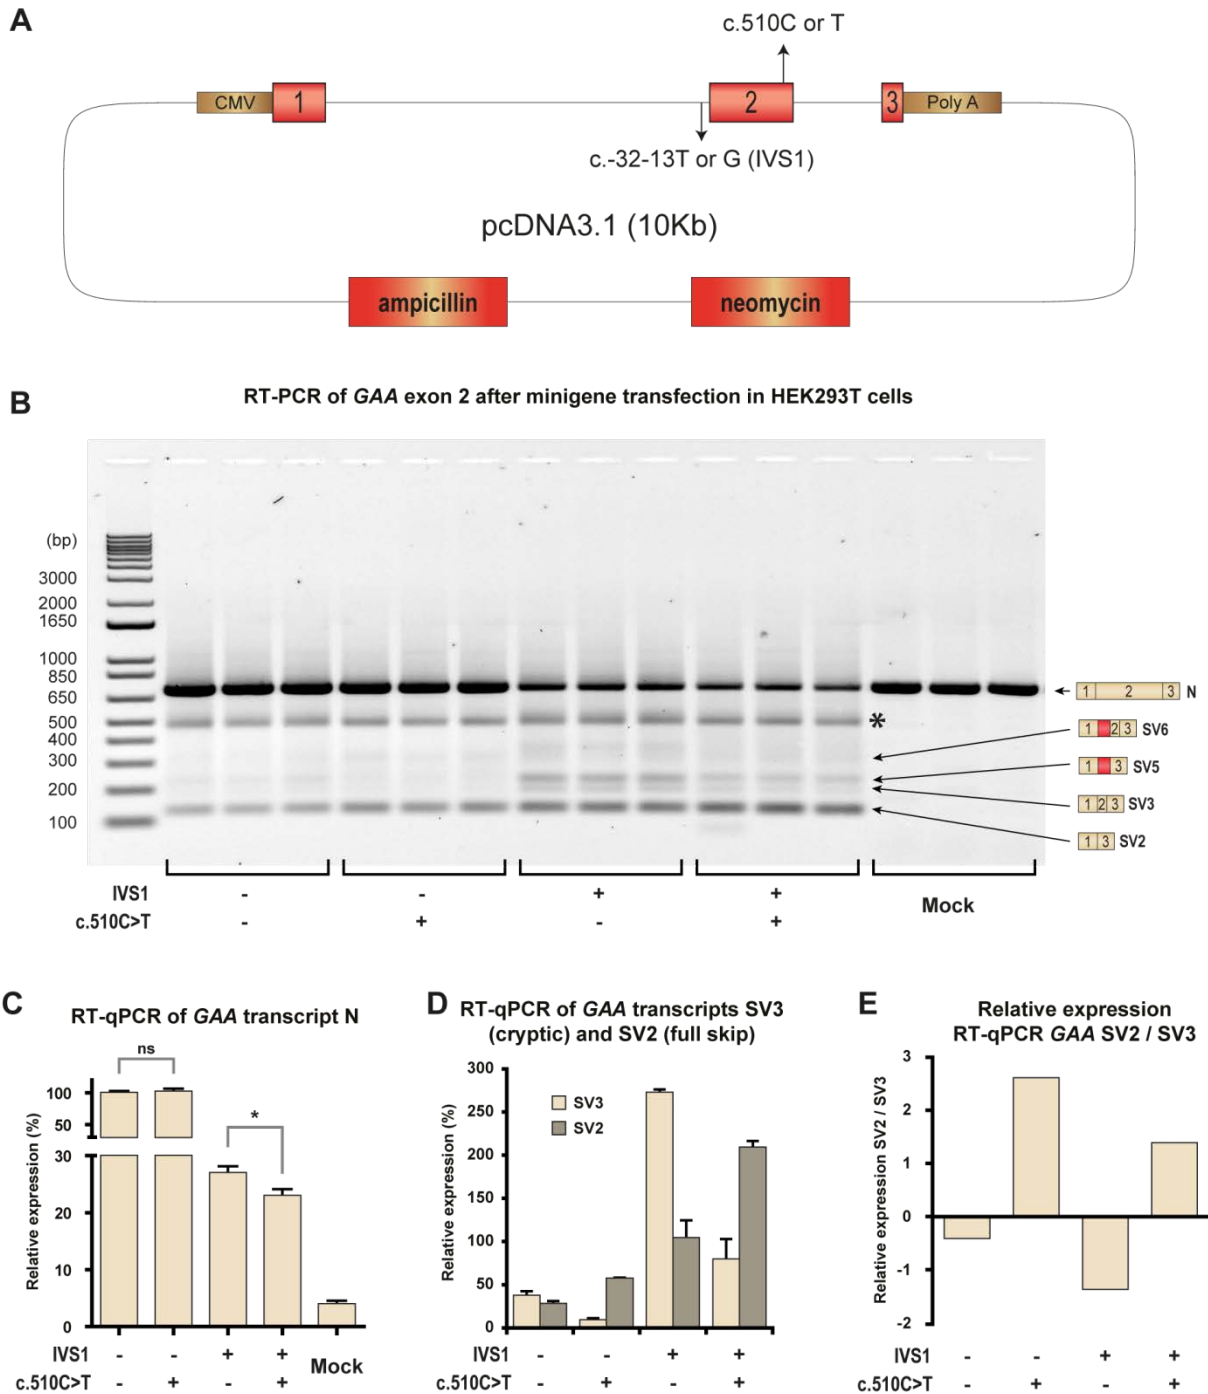

**Supplementary Figure S3: Analysis of c.510C>T in a minigene construct.** (A) Cartoon of the minigene. The full genomic DNA sequence of *GAA* exons 1-3 with or without the IVS1 variant were driven by the CMV promoter and contained a polyA signal from pcDNA3.1. c.510C>T was introduced by site-directed mutagenesis. (B) Flanking exon RT-PCR of *GAA* exon 2 in HEK293T cells transfected with *GAA* exon 1-3 minigenes containing the variants indicated below the gel. Mock: transfection of expression construct without minigene insert. Cartoons on the right of the figure depict five splice products (N, SV6, SV5, SV3 and SV2. \*: structural variant (see Suppl. Figure S4)). Please note that the PCRs represent end-point PCRs in which abundant products were saturated: in the mock transfected cells, a strong wild-type *GAA* product was observed, which was derived from endogenous *GAA* expression, but quantitative analysis using RT-qPCR showed that minigene transfection caused 28-fold higher expression of *GAA* exons 1-3 relative to endogenous expression (see C). (C) Quantification of N (normally spliced product) using RT-qPCR. c.510C>T caused lower expression of N, but only when present together with the IVS1 variant. (D) Quantification of aberrant splice products SV2 and SV3 using RT-qPCR. In mock transfected cells, SV2 and SV3 expression was undetectable and could therefore not be

quantified. (E) As in (D), but plotted as the ratio of expression of SV2 and SV3. Data in C and D are means  $\pm$  SD (n= 3 biological replicates). \*:  $p < 0.05$ , ns = not significant.

fast and slow cooling of RT-PCR products

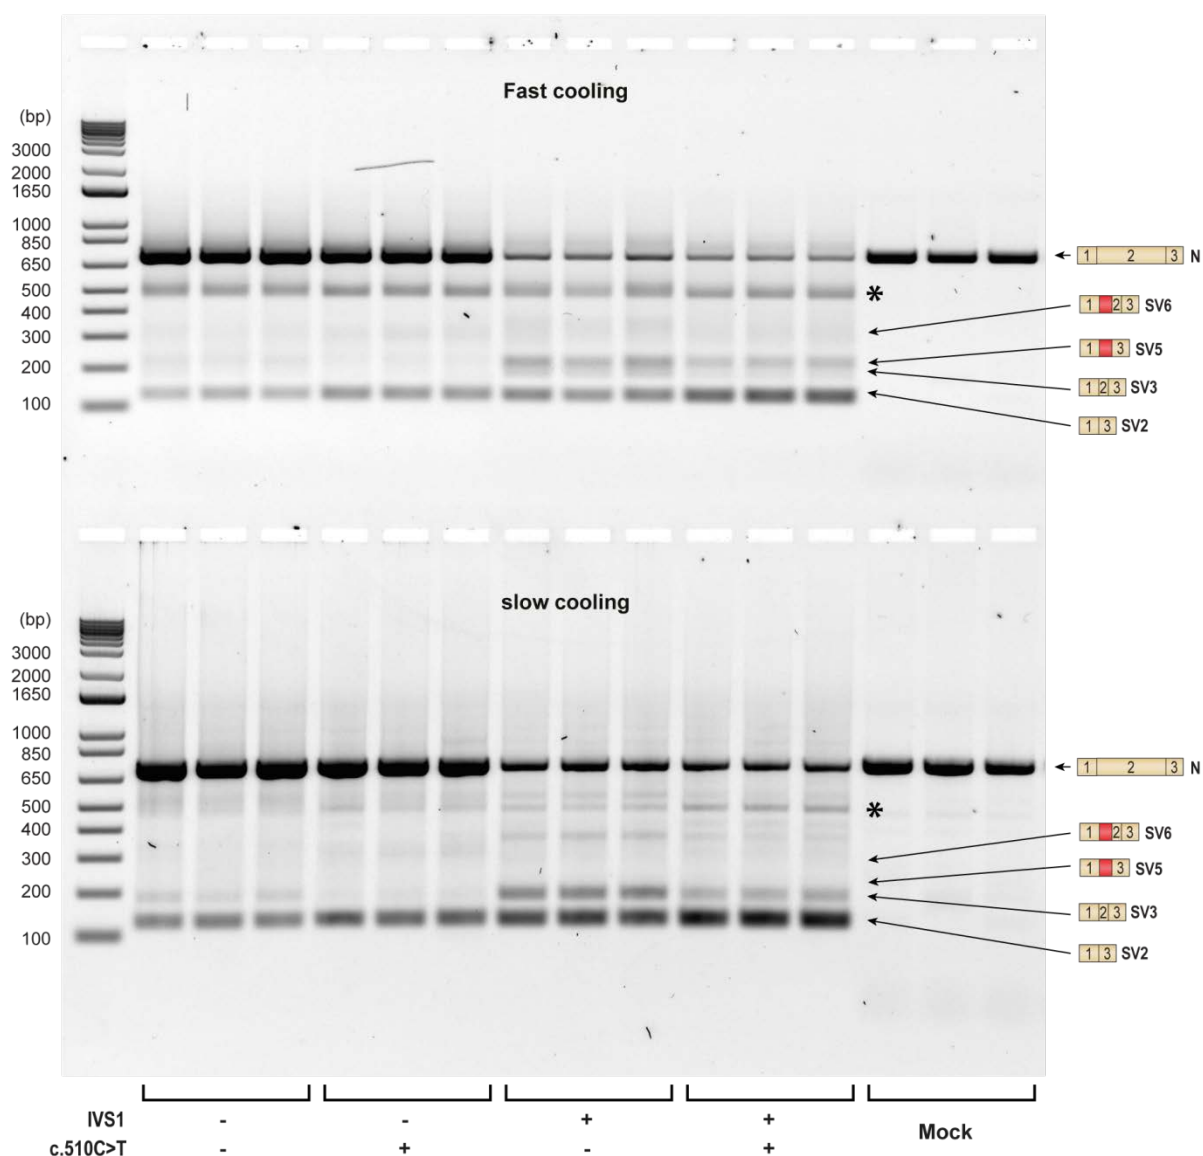

**Supplementary Figure S4: Characterization of the additional product of approximately 500 bp (\*).** This product appears to be a PCR artefact. We performed the PCR using the conventional PCR protocol (fast cooling) and a PCR with an additional slow cooling step (slow cooling, 1°C per 3 min. from 95°C to 4°C) at the end of the protocol. The 500 bp product (\*) was reduced significantly by slow cooling, indicating that it is likely the product of secondary structure formation. This is confirmed by our previous observation using topo cloning and sequencing of the PCR products, which identified all annotated products but failed to identify any product that matched the size of product \*.<sup>1;2</sup>

## SUPPLEMENTARY TABLES

Supplementary Table S1

| <i>Reference</i>                             | <i>Country of study</i> | <i>Total no. of late onset patients with reported genotype</i> | <i>Late onset patients with IVS1 variant</i> |
|----------------------------------------------|-------------------------|----------------------------------------------------------------|----------------------------------------------|
| Scheidegger et al., 2018 <sup>3</sup>        | Switzerland             | 7                                                              | 7                                            |
| Witkowski et al., 2018 <sup>4</sup>          | Poland                  | 5                                                              | 3                                            |
| Löscher et al., 2018 <sup>5</sup>            | Austria                 | 21                                                             | 17                                           |
| Montalvo et al., 2006 <sup>6</sup>           | Italy                   | 40                                                             | 34                                           |
| Angelini et al., 2009 <sup>7</sup>           | Italy                   | 6                                                              | 5                                            |
| Regnery et al., 2012 <sup>8</sup>            | Germany                 | 38                                                             | 32                                           |
| Semplicini et al., 2018 <sup>9</sup>         | France                  | 170                                                            | 151                                          |
| van der Meijden et al., 2017 <sup>10</sup>   | International           | 17                                                             | 14                                           |
| Kuperus et al., 2017 <sup>11</sup>           | Netherlands             | 102                                                            | 99                                           |
| Figuroa-Bonaparte et al., 2018 <sup>12</sup> | Spain                   | 32                                                             | 27                                           |
| Mori et al., 2017 <sup>13</sup>              | United States           | 51                                                             | 49                                           |
| Papadimas et al., 2011 <sup>14</sup>         | Greece                  | 9                                                              | 9                                            |
| Total no. of patients                        |                         | 498 (100%)                                                     | 447 (90%)                                    |

A literature study was performed to estimate the prevalence of the c.-32-13T>G (IVS1) variant by identifying Caucasian patients in various countries. Caution was taken to avoid duplicate entries. Studies were considered that provided genotype information and had not selected patients on the basis of the IVS1 genotype.



**Supplementary Table S2**

| <i>Patient / individual</i> | <i>c.-32-13T&gt;G (IVS1)<br/>(allele 1 / allele 2)</i> | <i>c.510C&gt;T<br/>(allele 1 / allele 2)</i> | <i>Disease-associated<br/>variant on the second<br/>allele</i> | <i>Cell type used for<br/>further investigation</i> | <i>Age at<br/>symptom<br/>onset (years)</i> | <i>Age at<br/>diagnosis<br/>(years)</i> |
|-----------------------------|--------------------------------------------------------|----------------------------------------------|----------------------------------------------------------------|-----------------------------------------------------|---------------------------------------------|-----------------------------------------|
| 1                           | + / -                                                  | + / -                                        | c.2331+2T>A                                                    | Fibroblasts                                         | 2.5                                         | 3                                       |
| 2                           | + / -                                                  | + / -                                        | c.525delT                                                      | Fibroblasts                                         | 6.5                                         | 11.7                                    |
| 3                           | + / -                                                  | + / -                                        | c.525delT                                                      | Fibroblasts                                         | 1                                           | 1.7                                     |
| 4                           | + / -                                                  | + / -                                        | c.1548G>A                                                      | Fibroblasts and<br>myoblasts                        | 7                                           | 9.5                                     |
| 5                           | + / -                                                  | + / -                                        | c.2135T>C                                                      | -                                                   | 0.8                                         | 0                                       |
| 6                           | + / -                                                  | + / -                                        | c.2135T>C                                                      | -                                                   | 0.8                                         | 2.3                                     |
| 7                           | + / -                                                  | + / -                                        | c.1441T>C                                                      | -                                                   | 12                                          | 4                                       |
| 8                           | + / -                                                  | + / -                                        | c.1933G>A                                                      | -                                                   | 13                                          | 14.1                                    |
| 9                           | + / -                                                  | + / -                                        | c.1051delG                                                     | -                                                   | 1                                           | 2.0                                     |

Patient information on the nine compound heterozygous IVS1 patients who carry the c.510C>T variant on the IVS1 allele. Molecular analysis of patients 1 to 4 was performed in more detail in Figures 3 and 5.

**Supplementary Table S3**

| <i>Patient / individual</i> | <i>c.-32-13T&gt;G (IVS1) (allele 1 / allele 2)</i> | <i>c.510C&gt;T (allele 1 / allele 2)</i> | <i>Disease-associated variant on the second allele</i> | <i>Cell type used for further investigation</i> | <i>Age at symptom onset (years)</i> | <i>Age at diagnosis (years)</i> |
|-----------------------------|----------------------------------------------------|------------------------------------------|--------------------------------------------------------|-------------------------------------------------|-------------------------------------|---------------------------------|
| 10                          | + / -                                              | - / -                                    | c.525delT                                              | Fibroblasts                                     | 5                                   | 10.7                            |
| 11                          | + / -                                              | - / -                                    | c.525delT                                              | Fibroblasts                                     | 8.9                                 | 9.4                             |
| 12                          | + / -                                              | - / -                                    | c.2331+2T>A                                            | Fibroblasts                                     | 5                                   | 7.8                             |
| 13                          | + / -                                              | - / -                                    | c.525delT                                              | Fibroblasts                                     | 15                                  | 25                              |
| 14                          | - / -                                              | - / -                                    | -                                                      | Fibroblasts                                     | Healthy control                     | Healthy control                 |
| 15                          | - / -                                              | - / -                                    | -                                                      | Fibroblasts                                     | Healthy control                     | Healthy control                 |
| 16                          | + / -                                              | - / -                                    | c.2481+102_2646+31del *                                | Myoblasts                                       | -                                   | -                               |
| 17                          | + / +                                              | + / +                                    | IVS1                                                   | Fibroblasts                                     | 59                                  | 60                              |
| 18                          | + / +                                              | + / +                                    | IVS1                                                   | Myoblasts                                       | 48                                  | 50                              |
| 19                          | + / +                                              | + / -                                    | IVS1                                                   | -                                               | 12                                  | -                               |
| 20                          | + / +                                              | - / -                                    | IVS1                                                   | Fibroblasts                                     | 49                                  | 51                              |
| 21                          | + / +                                              | - / -                                    | IVS1                                                   | -                                               | 58                                  | -                               |
| 22                          | + / +                                              | - / -                                    | IVS1                                                   | -                                               | 42                                  | -                               |
| 23                          | + / +                                              | - / -                                    | IVS1                                                   | -                                               | Asymptomatic                        | Asymptomatic                    |
| 24                          | + / +                                              | - / -                                    | IVS1                                                   | -                                               | Asymptomatic                        | Asymptomatic                    |
| 25                          | + / +                                              | - / -                                    | IVS1                                                   | -                                               | Asymptomatic                        | Asymptomatic                    |
| 26                          | + / +                                              | - / -                                    | IVS1                                                   | -                                               | Asymptomatic                        | Asymptomatic                    |

Patient information on other patients analyzed in more detail in this paper (Figures 3, 4 and 5). For clarity, patients in gray are homozygous for the IVS1 variant.

\* The c.2481+102\_2646+31del (deletion of exon 18) variant allows for normal expression of GAA exon 1-3 mRNA (product N).

**Supplementary Table S4**

| <i>Primer name</i>              | <i>Primer sequence</i>          | <i>Purpose</i>                                  |
|---------------------------------|---------------------------------|-------------------------------------------------|
| IVS1_spec_downstream_fw         | TCCCTGCTGAGCCCGCTTG             | Allele-(a)specific primers <i>GAA</i> exon 1-3  |
| aspec_downstream_rv             | GAAGGGCTCCTCGGAGAA              |                                                 |
| nonIVS1_spec_downstream_fw      | TCCCTGCTGAGCCCGCTTT             |                                                 |
| aspec_upstream_fw               | CGAGCTCCCGCGGTCACGTGACCC        |                                                 |
| IVS1_spec_upstream_rv           | GCTCCTACAGGCCTGCGGGAGAAGC       |                                                 |
| SQ_intron1_rv1                  | CGGGATTTTGCCATGTTACC            |                                                 |
| SQ_intron1_rv2                  | GGTTAACAAGTACCAACGACC           |                                                 |
| SQ_intron1_rv3                  | TGTTACAGAAGGCTTGGCTGG           |                                                 |
| SQ_intron1_rv4                  | TGCCTTGGTGTGTTCCACAAC           |                                                 |
| SQ_intron1_rv5                  | GACTGAGCACTGCGTCGATC            |                                                 |
| SQ_intron1_rv6                  | CCTCAGTTTCCCCGTCAGCTG           |                                                 |
| SQ_intron2_rv1                  | TGAGGTGCGTGGGTGTCGATGTC         |                                                 |
| <i>GAA</i> _flank_Exon2_fw      | AGGTTCTCCTCGTCCGCCGTTGTCA       | Flanking exon PCR <i>GAA</i> exon 2             |
| <i>GAA</i> _flank_Exon2_rv      | TCCAAGGGCACCTCGTAGCGCCTGTTA     |                                                 |
| qPCR_ <i>Actin</i> _fw          | AACCGCGAGAAGATGACCC             | Normalization of fibroblast cDNA input          |
| qPCR_ <i>Actin</i> _rv          | GCCAGAGGCGTACAGGGATAG           |                                                 |
| qPCR_ <i>Neomycin</i> _fw       | TCATCTCACCTTGCTCCTGC            | Normalization of minigene cDNA input            |
| qPCR_ <i>Neomycin</i> _rv       | GTGGTCGAATGGGCAGGTAG            |                                                 |
| qPCR_ <i>GAA</i> _Exon1-2_fw    | AAACTGAGGCACGGAGCG              | Quantification splice product N                 |
| qPCR_ <i>GAA</i> _Exon1-2_rv    | GAGTGCAGCGGTTGCCAA              |                                                 |
| qPCR_ <i>GAA</i> _CrypticE2_fw  | GGCACGGAGCGGGACA                | Quantification splice product SV3               |
| qPCR_ <i>GAA</i> _CrypticE2_rv  | CTGTTAGCTGGATCTTTGATCGTG        |                                                 |
| qPCR_ <i>GAA</i> _SkipE2_fw     | AGGCACGGAGCGGATCA               | Quantification splice product SV2               |
| qPCR_ <i>GAA</i> _SkipE2_rv     | TCGGAGAACTCCACGCTGTA            |                                                 |
| SDM_ <i>GAA</i> _c.-32-13T>G_fw | CTGCTGAGCCCCTTGCTTCTCCCGCAGGCC  | Primers for Site Directed Mutagenesis minigenes |
| SDM_ <i>GAA</i> _c.-32-13T>G_rv | GGCCTGCGGGAGAAGCAAGCGGGCTCAGCAG |                                                 |
| SDM_ <i>GAA</i> _c.510C>T_fw    | ACCCTGCGGCTGGATGTGATGATGGAGACT  |                                                 |
| SDM_ <i>GAA</i> _c.510C>T_rv    | AGTCTCCATCATCACATCCAGCCGAGGGT   |                                                 |

Primers used for PCR, sequencing, and Site Directed Mutagenesis.

## REFERENCES SUPPLEMENTARY DATA

1. van der Wal, E., Bergsma, A.J., Pijnenburg, J.M., van der Ploeg, A.T., and Pijnappel, W. (2017). Antisense Oligonucleotides Promote Exon Inclusion and Correct the Common c.-32-13T>G GAA Splicing Variant in Pompe Disease. *Mol Ther Nucleic Acids* 7, 90-100.
2. van der Wal, E., Bergsma, A.J., van Gestel, T.J.M., In 't Groen, S.L.M., Zaehres, H., Arauzo-Bravo, M.J., Scholer, H.R., van der Ploeg, A.T., and Pijnappel, W. (2017). GAA Deficiency in Pompe Disease Is Alleviated by Exon Inclusion in iPSC-Derived Skeletal Muscle Cells. *Mol Ther Nucleic Acids* 7, 101-115.
3. Scheidegger, O., Leupold, D., Sauter, R., Findling, O., Rosler, K.M., and Hundsberger, T. (2018). 36-Months follow-up assessment after cessation and resuming of enzyme replacement therapy in late onset Pompe disease: data from the Swiss Pompe Registry. *J Neurol*.
4. Witkowski, G., Konopko, M., Rola, R., Lugowska, A., Ryglewicz, D., and Sienkiewicz-Jarosz, H. (2018). Enzymatic replacement therapy in patients with late-onset Pompe disease - 6-Year follow up. *Neurol Neurochir Pol* 52, 465-469.
5. Loscher, W.N., Huemer, M., Stulnig, T.M., Simschitz, P., Iglseider, S., Eggers, C., Moser, H., Moslinger, D., Freilinger, M., Lagler, F., et al. (2018). Pompe disease in Austria: clinical, genetic and epidemiological aspects. *J Neurol* 265, 159-164.
6. Montalvo, A.L., Bembi, B., Donnarumma, M., Filocamo, M., Parenti, G., Rossi, M., Merlini, L., Buratti, E., De Filippi, P., Dardis, A., et al. (2006). Mutation profile of the GAA gene in 40 Italian patients with late onset glycogen storage disease type II. *Human mutation* 27, 999-1006.
7. Angelini, C., Semplicini, C., Tonin, P., Filosto, M., Pegoraro, E., Soraru, G., and Fanin, M. (2009). Progress in Enzyme Replacement Therapy in Glycogen Storage Disease Type II. *Ther Adv Neurol Disord* 2, 143-153.
8. Regnery, C., Kornblum, C., Hanisch, F., Vielhaber, S., Strigl-Pill, N., Grunert, B., Muller-Felber, W., Glocker, F.X., Spranger, M., Deschauer, M., et al. (2012). 36 months observational clinical study of 38 adult Pompe disease patients under alglucosidase alfa enzyme replacement therapy. *J Inherit Metab Dis* 35, 837-845.
9. Semplicini, C., Letard, P., De Antonio, M., Taouagh, N., Perniconi, B., Bouhour, F., Echaniz-Laguna, A., Orlikowski, D., Sacconi, S., Salort-Campana, E., et al. (2018). Late-onset Pompe disease in France: molecular features and epidemiology from a nationwide study. *J Inherit Metab Dis*.
10. Kuperus, E., van der Meijden, J.C., In 't Groen, S.L.M., Kroos, M.A., Hoogeveen-Westerveld, M., Rizopoulos, D., Martinez, M.Y.N., Kruijshaar, M.E., van Doorn, P.A., van der Beek, N., et al. (2018). The ACE I/D polymorphism does not explain heterogeneity of natural course and response to enzyme replacement therapy in Pompe disease. *PLoS One* 13, e0208854.
11. Kuperus, E., Kruijshaar, M.E., Wens, S.C.A., de Vries, J.M., Favejee, M.M., van der Meijden, J.C., Rizopoulos, D., Brusse, E., van Doorn, P.A., van der Ploeg, A.T., et al. (2017). Long-term benefit of enzyme replacement therapy in Pompe disease: A 5-year prospective study. *Neurology* 89, 2365-2373.
12. Figueroa-Bonaparte, S., Llauger, J., Segovia, S., Belmonte, I., Pedrosa, I., Montiel, E., Montesinos, P., Sanchez-Gonzalez, J., Alonso-Jimenez, A., Gallardo, E., et al. (2018). Quantitative muscle MRI to follow up late onset Pompe patients: a prospective study. *Sci Rep* 8, 10898.
13. Mori, M., Haskell, G., Kazi, Z., Zhu, X., DeArme, S.M., Goldstein, J.L., Bali, D., Rehder, C., Cirulli, E.T., and Kishnani, P.S. (2017). Sensitivity of whole exome sequencing in detecting infantile- and late-onset Pompe disease. *Mol Genet Metab* 122, 189-197.
14. Papadimas, G.K., Terzis, G., Methenitis, S., Spengos, K., Papadopoulos, C., Vassilopoulou, S., Kavouras, S., Michelakakis, H., and Manta, P. (2011). Body composition analysis in late-onset Pompe disease. *Mol Genet Metab* 102, 41-43.
